# Supplementary material for: Apple polyphenol extract ameliorates sugary-diet-induced depression-like behaviors in male C57BL/6 mice by inhibiting the inflammation of the gut–brain axis
Source: Royal Society of Chemistry journal article supplement (doi:10.1039/d3fo04606k), 2024-01-01

### Figure 1. Original western blot in the colon

There are four membranes in figure 1, (A), (B), (C), and (D). The left column shows the blots without marker and displayed in the manuscript, and the corresponding marked marker are shown in the right column.

p-I $\kappa$ B $\alpha$  (39kDa) and GAPDH (37kDa) in (B), I $\kappa$ B $\alpha$  (39kDa) and GAPDH (37kDa) in (D) are from the same blots using Western Stripping buffer (P0025, Beyotime).

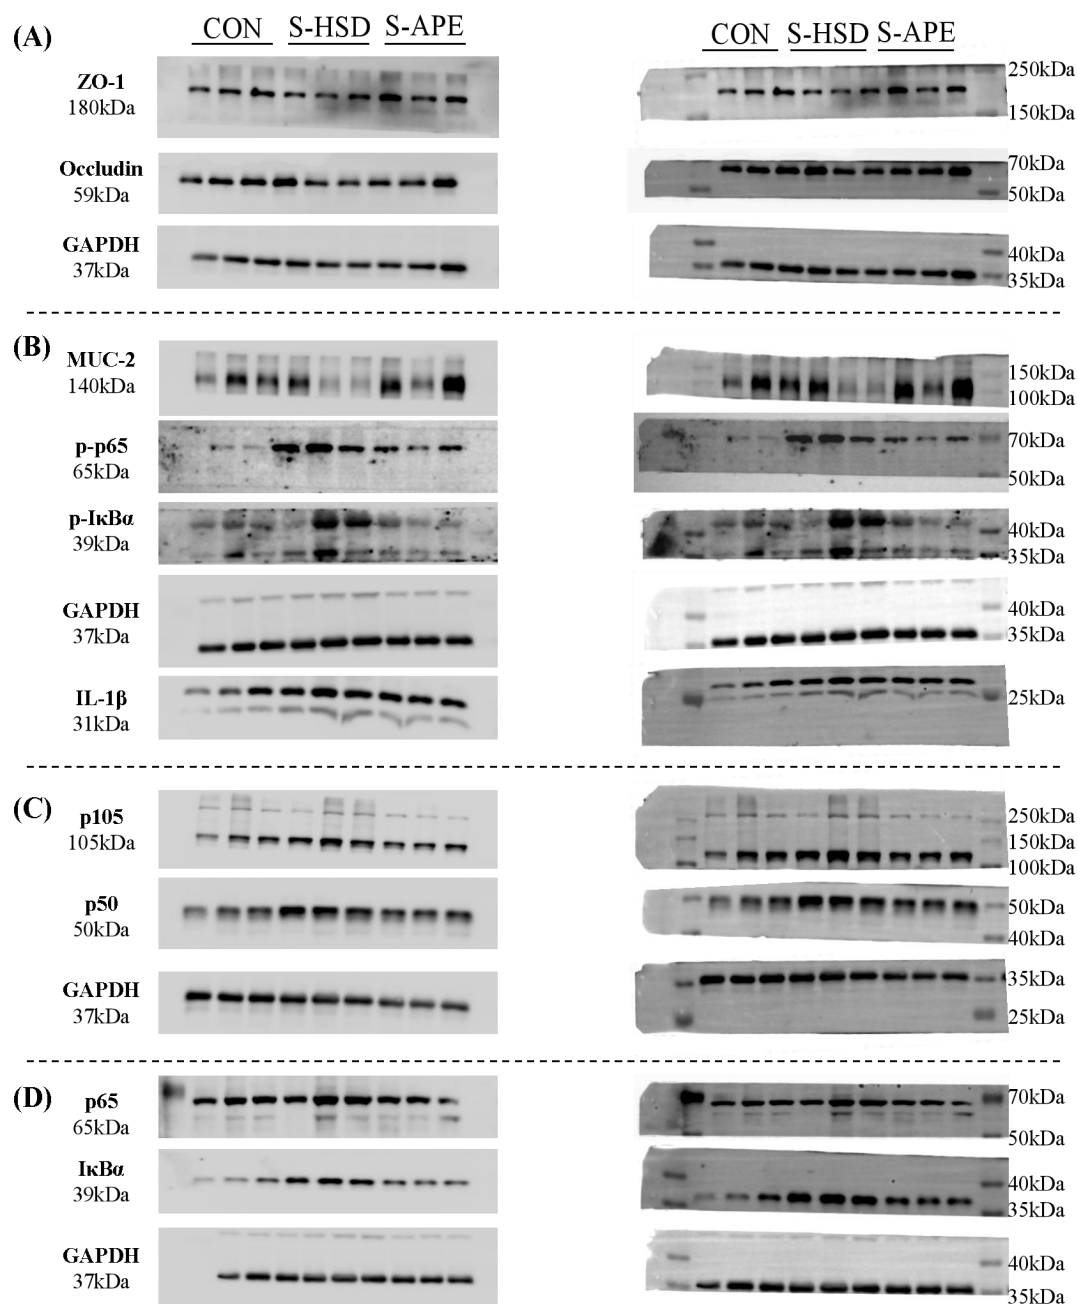

## Figure 2. Original western blot in the hippocampus

There are three membranes in figure 2, (A), (B), and (C). The left column shows the blots without marker and displayed in the manuscript, and the corresponding marked marker are shown in the right column.

p105 (105kDa) and IKK $\beta$  (87kDa), p65 (65kDa) and p50 (50kDa), I $\kappa$ B $\alpha$  (39kDa) and GAPDH (37kDa) in (C) are from the same blots using Western Stripping buffer (P0025, Beyotime).

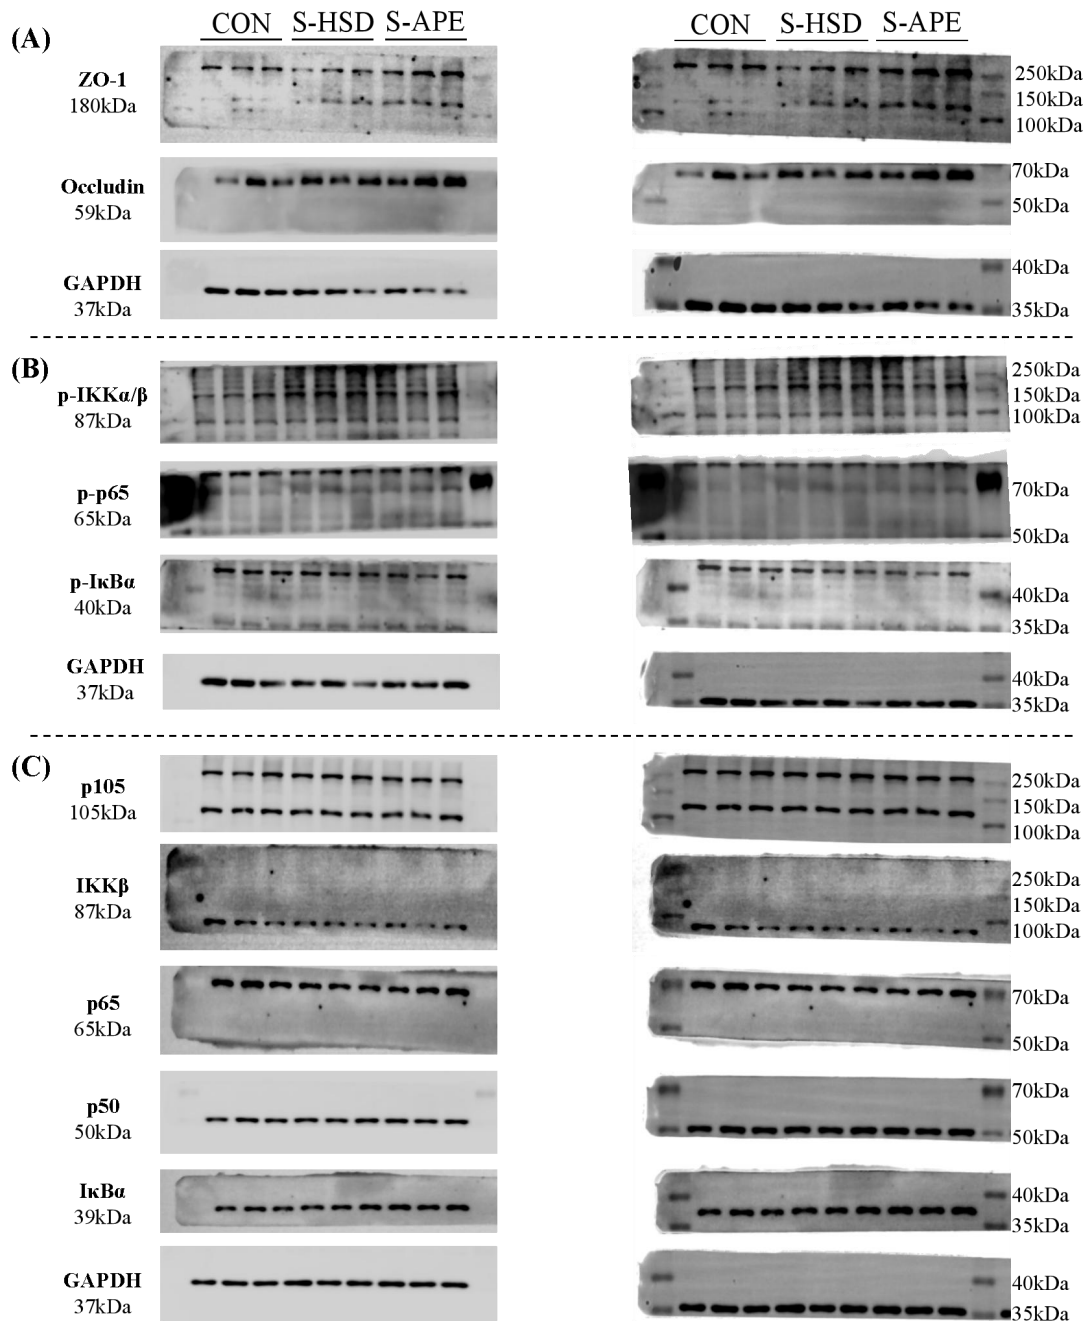

Supplement: d3fo04606k1.pdf [file d3fo04606k1.pdf]
