# Supplementary material for: Apple polyphenol extract ameliorates sugary-diet-induced depression-like behaviors in male C57BL/6 mice by inhibiting the inflammation of the gut–brain axis
Source: Royal Society of Chemistry journal article supplement (doi:10.1039/d3fo04606k), 2024-01-01
Supplement: d3fo04606k2.pdf [file d3fo04606k2.pdf]

**Table S1 Ingredients of Apple Polyphenols Extract**

|                         | <b>Ingredient</b> | <b>Content (%)</b> |
|-------------------------|-------------------|--------------------|
| <b>Polyphenols</b>      | <b>Total</b>      | <b>80.1</b>        |
|                         | Chlorogenic acid  | 15.2               |
|                         | Phlorizin         | 6.55               |
|                         | Procyanidin B2    | 4.05               |
|                         | Epicatechin       | 3.13               |
|                         | Catechin          | 1.36               |
|                         | Phloretin         | 1.07               |
|                         | Quercetin         | 0.29               |
|                         | Caffeic acid      | 0.05               |
|                         | Ellagic acid      | 0.05               |
|                         | Rutin             | 0.04               |
| Others                  | 48.29             |                    |
| <b>Other components</b> | <b>Total</b>      | <b>19.9</b>        |
|                         | Moisture          | 2.98               |
|                         | Protein           | 1.89               |
|                         | Glucose           | 1.07               |
|                         | Total fiber       | 0.85               |
|                         | Others            | 13.1               |
